# Supplementary material for: System-level feasibility analysis of a novel chemical looping combustion integrated with electrochemical CO2 reduction
Source: Royal Society of Chemistry journal article supplement (doi:10.1039/d4se00770k), 2024-01-01
Supplement: d4se00770k1.pdf [file d4se00770k1.pdf]

## Electronic Supplementary Information

for

### **System-level feasibility analysis of a novel chemical looping combustion integrated with electrochemical CO<sub>2</sub> reduction**

Nimish Pankhedkar<sup>a</sup>, Rohan Sartape<sup>b</sup>, Meenesh Singh<sup>b</sup>, Ravindra Gudi<sup>a,\*</sup>, Pratim Biswas<sup>c</sup>

<sup>a</sup> Department of Chemical Engineering,  
Indian Institute of Technology, Bombay,  
Powai, Mumbai, 400 076, India.

<sup>b</sup> Department of Chemical Engineering,  
University of Illinois Chicago, 929 W. Taylor St.,  
Chicago, Illinois 60607, United States.

<sup>c</sup> Dept of Chemical, Environmental and Materials Engineering,  
University of Miami,  
Coral Gables, FL 33146, USA.

\* To Whom Correspondence Must be Addressed: Ravindra Gudi, E-mail: [ravigudi@iitb.ac.in](mailto:ravigudi@iitb.ac.in)

## S1. Reactions involved in modeling of in-situ gasification CLC

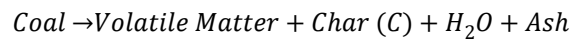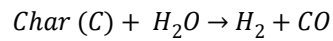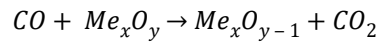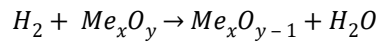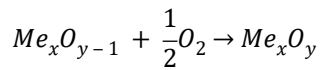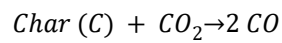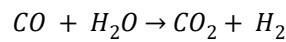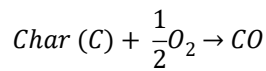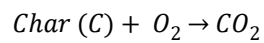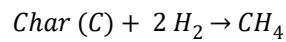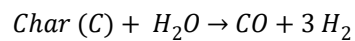

The *RGIBBS* reactor module estimates the product composition based on the minimization of Gibbs Free energy of the system.

$$G^{total} = \sum_{i=1}^N n_i G_i^0 + R(T + 273.15) \sum_{i=1}^N n_i \ln \left( \frac{f_i}{f_i^0} \right)$$

Where,

$G_i^0$ : Gibbs free energy of species *i* under standard conditions

R: molar gas constant

$f_i, f_i^0$ : fugacity of each species at standard operating conditions.

The *RYIELD* reactor module utilizes the ultimate and proximate analysis details to estimate the yields of the components.

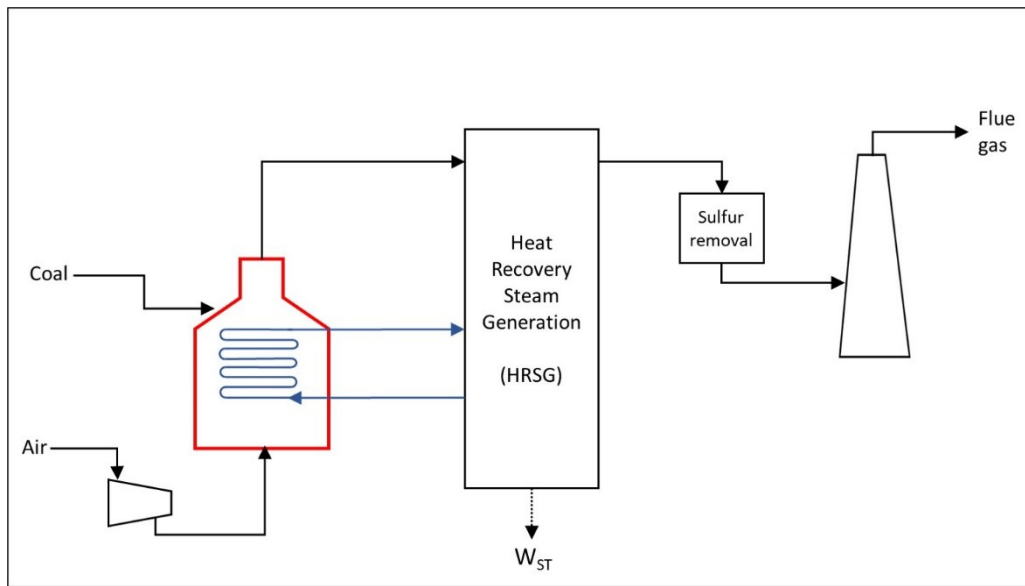

S2. Conventional processes considered for relative analysis

Figure S1 Schematic flow diagram for a conventional coal fired power plant

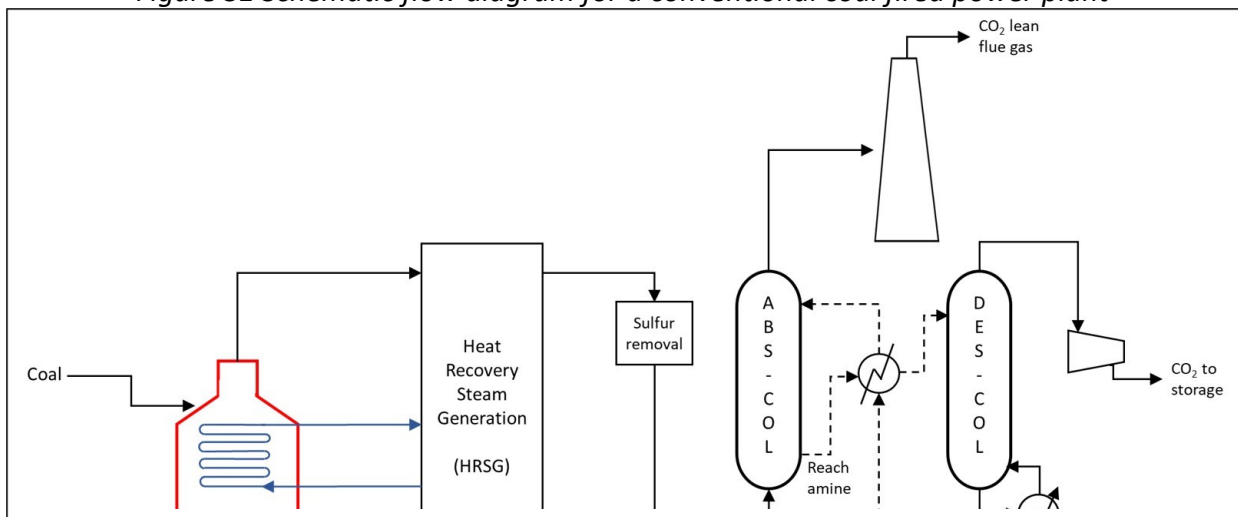

Figure S2 Schematic flow diagram for a conventional coal fired power with amine -based CO<sub>2</sub> capture (PCFPP+CCS)



|                             |                 |
|-----------------------------|-----------------|
| <i>FCI</i>                  | DC + IC         |
| <i>Working Capital (WC)</i> | 75% of FCI      |
| <b>TCI</b>                  | <b>FCI + WC</b> |

Table S2 CAPEX Estimation details [48,49,55]

---

**CEPCI (2001) = 397**

---

|                        |                                                                         |                                                    |                  |
|------------------------|-------------------------------------------------------------------------|----------------------------------------------------|------------------|
| <b>Heat Exchangers</b> | $\log_{10} C_p^\circ = K_1 + K_2 \log_{10} (A) + K_3 [\log_{10} (A)]^2$ | where,<br>A = Heat transfer area (m <sup>2</sup> ) | $K_1 = 4.1884$   |
|                        |                                                                         |                                                    | $K_2 = -0.2503$  |
|                        |                                                                         |                                                    | $K_3 = 0.1974$   |
| <b>Turbine</b>         | $\log_{10} C_p^\circ = K_1 + K_2 \log_{10} (A) + K_3 [\log_{10} (A)]^2$ | where,<br>A = Power (kW)                           | $K_1 = -21.7702$ |
|                        |                                                                         |                                                    | $K_2 = 13.2175$  |
|                        |                                                                         |                                                    | $K_3 = -1.5279$  |
| <b>Compressor</b>      | $\log_{10} C_p^\circ = K_1 + K_2 \log_{10} (A) + K_3 [\log_{10} (A)]^2$ | where,<br>A = Power (kW)                           | $K_1 = 2.2897$   |
|                        |                                                                         |                                                    | $K_2 = 1.3604$   |
|                        |                                                                         |                                                    | $K_3 = -0.1027$  |

---

*S3-c: Estimation of metal oxide requirement:*

The oxygen carrier loading has been estimated based on the typical residence time in the CLC reactors (Fluidized bed type). It has been reported in Mantripragada et. al., 2012, Wolf et. al., 2005, and Naqvi et. al., 2005 that the residence times in AR and FR are around 4s and 60s respectively, and the same have been considered for estimating the metal oxide inventory. Furthermore, as suggested by Mantripragada et. al., 2012, a degradation rate of '0.027 % / hr' has been utilized to estimate the make-up oxygen carrier. This rate is based on the lifetime of the metal oxide particles observed during the experimental tests performed by Abad et. al.,

2009 and Mattison et. al. 2007. Assumptions: Residence time in AR = 4 s, Residence time in FR = 60 s, Degradation rate = 0.0272 %/hr [50]

*Solid inventory = (Flow of OC × Residence time) × Excess factor*

*∴ Total Solid inventory = 4.24 tonnes*

*Make up OC = Total Solid inventory × Degradation rate × Annual operating hours*

*Makeup OC = 9.24 tonnes/year*
